# Supplementary material for: virtualArray: a R/bioconductor package to merge raw data from different microarray platforms
Source: Springer Nature journal article supplement (doi:10.1186/1471-2105-14-75), 2013-03-02
Supplement: 12859_2012_5720_MOESM2_ESM.pdf [file 12859_2012_5720_MOESM2_ESM.pdf]

input data: more than one ExpressionSet with valid annotation link

ExpressionSet A

ExpressionSet B

extract chip platform

load current annotation, respectively

if not available, fetch from internet

Experiment study A

| ID      | sample x | sample y | sample z |
|---------|----------|----------|----------|
| probe x | 5.1      | 5.2      | 5.005    |
| probe y | 8.3      | 9.1      | 8.4      |
| probe z | 12.8     | 13.1     | 12.9     |
| ...     | ...      | ...      | ...      |

raw  
expression data

Experiment study B

| ID      | sample a | sample b | sample c |
|---------|----------|----------|----------|
| probe a | 5.2      | 5.005    | 5.1      |
| probe b | 9.1      | 8.4      | 8.3      |
| probe c | 12.9     | 12.8     | 13.1     |
| ...     | ...      | ...      | ...      |

+

+

| ID      | symbol |
|---------|--------|
| probe x | XA1    |
| probe y | YB2    |
| probe z | ZC3    |
| ...     | ...    |

current  
annotation

| ID      | symbol |
|---------|--------|
| probe a | XA1    |
| probe b | YB2    |
| probe c | ZC3    |
| ...     | ...    |

discard non-matching lines

collapse multiple values targeting  
the same gene by given function

| ID  | sample x | sample y | sample z |
|-----|----------|----------|----------|
| XA1 | 5.1      | 5.2      | 5.005    |
| YB2 | 8.3      | 9.1      | 8.4      |
| ZC3 | 12.8     | 13.1     | 12.9     |
| ... | ...      | ...      | ...      |

reannotated  
expression data

| ID  | sample a | sample b | sample c |
|-----|----------|----------|----------|
| XA1 | 5.2      | 5.005    | 5.1      |
| YB2 | 9.1      | 8.4      | 8.3      |
| ZC3 | 12.9     | 12.8     | 13.1     |
| ... | ...      | ...      | ...      |

discard non-matching lines

concatenate expression matrices

combined  
expression matrix

| ID  | batch 1  | batch 1  | batch 1  | batch 2  | batch 2  | batch 2  |
|-----|----------|----------|----------|----------|----------|----------|
|     | sample x | sample y | sample z | sample a | sample b | sample c |
| XA1 | 5.1      | 5.2      | 5.005    | 5.2      | 5.005    | 5.1      |
| YB2 | 8.3      | 9.1      | 8.4      | 9.1      | 8.4      | 8.3      |
| ZC3 | 12.8     | 13.1     | 12.9     | 12.9     | 12.8     | 13.1     |
| ... | ...      | ...      | ...      | ...      | ...      | ...      |

batch effect removal using empirical  
bayes networks

modified  
expression matrix

| ID  | batch 1  | batch 1  | batch 1  | batch 2  | batch 2  | batch 2  |
|-----|----------|----------|----------|----------|----------|----------|
|     | sample x | sample y | sample z | sample a | sample b | sample c |
| XA1 | 5.1      | 5.5      | 5.005    | 5.2      | 5.005    | 5.6      |
| YB2 | 8.3      | 9.1      | 8.4      | 10.1     | 8.4      | 8.3      |
| ZC3 | 10.0     | 13.1     | 12.9     | 12.9     | 12.8     | 13.1     |
| ... | ...      | ...      | ...      | ...      | ...      | ...      |
