# Supplementary material for: virtualArray: a R/bioconductor package to merge raw data from different microarray platforms
Source: Springer Nature journal article supplement (doi:10.1186/1471-2105-14-75), 2013-03-02

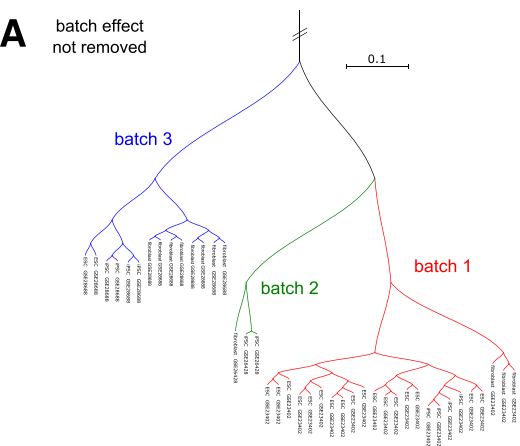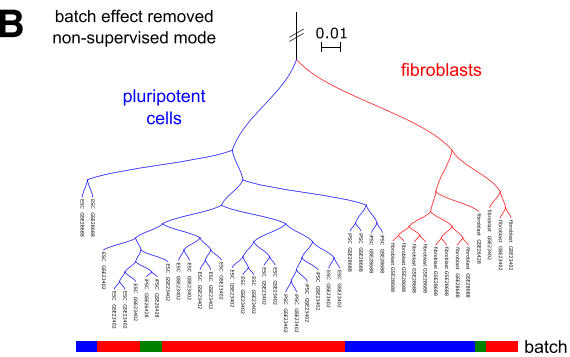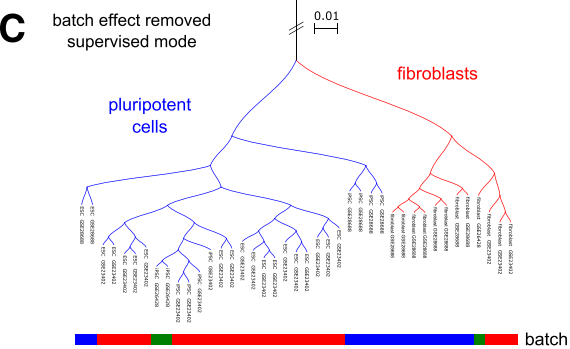

**D** batch effect removed - non-supervised mode

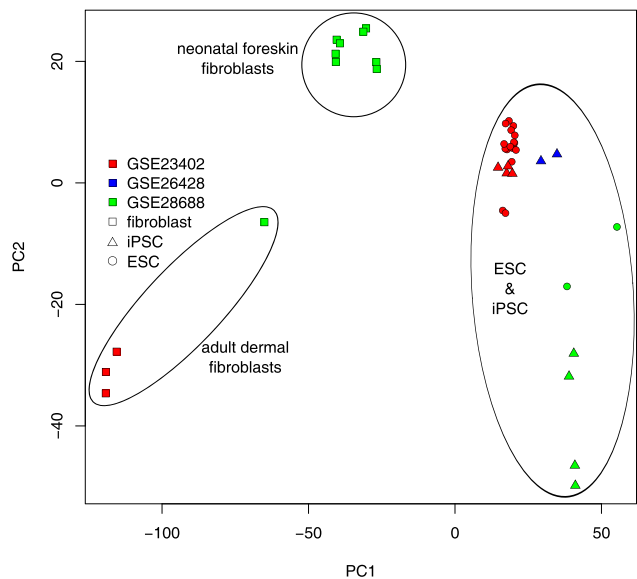

**E** batch effect removed - supervised mode

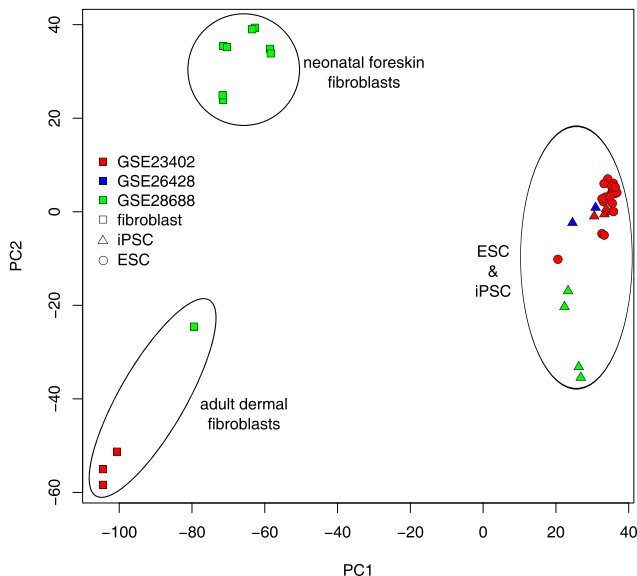

Supplement: 12859_2012_5720_MOESM3_ESM.pdf [file 12859_2012_5720_MOESM3_ESM.pdf]
